# Supplementary material for: Association between Light-Intensity and Moderate-to-Vigorous-Intensity Physical Activity Habits and Kidney Dysfunction: A General Population Cohort Study
Source: Hindawi journal article supplement (doi:10.1155/2023/9677484), 2023-05-27
Supplement: f1 [file 9677484.f1.docx]

**Supplementary Table 1:** Questionnaire items and group classification

| **Questionnaire to check physical activity habits** |
| --- |
| **Q1. Regular light-intensity physical activity (LPA)** |
| “Do you walk or do similar physical activity for at least one hour a day in your daily life?” |
| **Q2. Occasional moderate-to-vigorous-intensity physical activity (MVPA)** |
| “Have you been exercising with a light sweat for at least 30 minutes twice a week   for at least one year?” |

| **Group classification** | | | | |
| --- | --- | --- | --- | --- |
|  | **Inactive** | **LPA** | **MVPA** | **LPA+MVPA** |
| **Q1** | No | Yes | No | Yes |
| **Q2** | No | No | Yes | Yes |
